# Supplementary material for: Synthesis and Catalytic Study of NiAg Bimetallic Core–Shell Nanoparticles
Source: MDPI journal article supplement (doi:10.3390/ma16020659), 2023-01-10

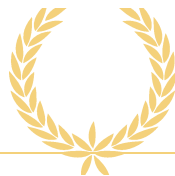

We certify that the following article

**Synthesis and catalytic study of NiAg bimetallic core-shell nanoparticles.**

Konrad Wojtaszek, Filip Cebula, Bogdan Rutkowski, Edit Csapó, Marek Wojnicki \*

has undergone English language editing by MDPI. The text has been checked for correct use of grammar and common technical terms, and edited to a level suitable for reporting research in a scholarly journal.

MDPI uses experienced, native English speaking editors. Full details of the editing service can be found at

► <https://www.mdpi.com/authors/english>.

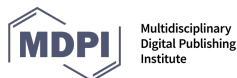

Basel, Switzerland  
December 2022

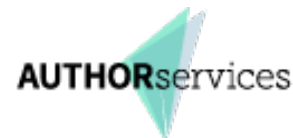

Supplement: s1 [file s1]
