# Supplementary material
Source: MDPI journal article supplement (https://www.mdpi.com/1996-1944/16/2/659)
Supplement: s1 [file s1]

Archive with 1 entries (1 files):
- materials-2009505-supplementary.pdf
